# Supplementary material for: Src kinase inhibition restores E-cadherin expression in dasatinib-sensitive pancreatic cancer cells
Source: PubMed Central journal article supplement (PMC6383685; doi:10.18632/oncotarget.26621), 2019-02-01
Supplement: oncotarget-10-1056-s001.pdf [file oncotarget-10-1056-s001.pdf]

# Src kinase inhibition restores E-cadherin expression in dasatinib-sensitive pancreatic cancer cells

## SUPPLEMENTARY MATERIALS

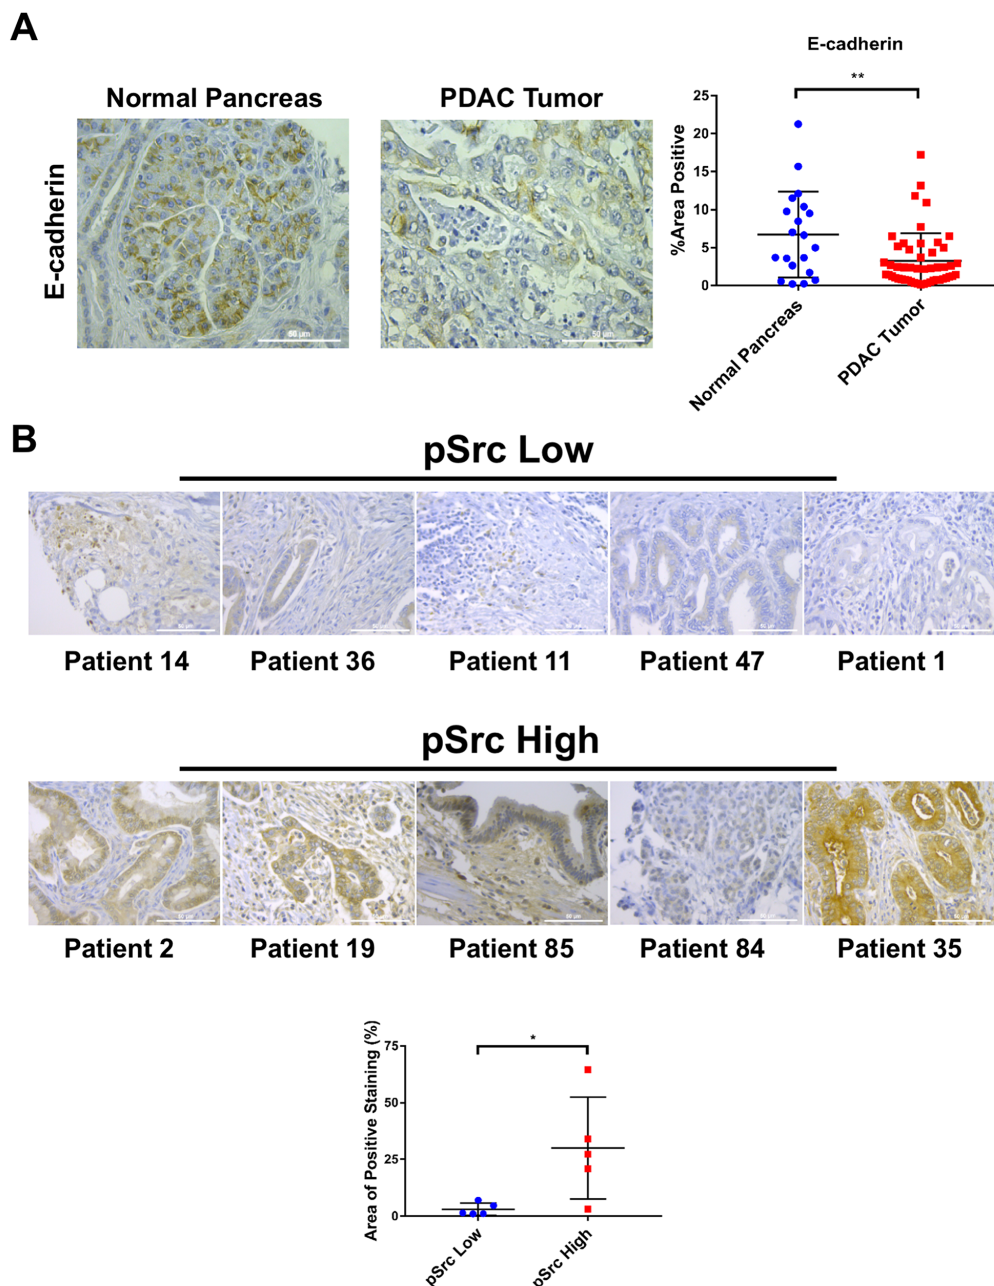

**Supplementary Figure 1:** Tissue microarray (TMA) of normal pancreas (N=20) and human PDAC tumor (N=50) samples were analyzed for E-cadherin expression (A). Patient tissue specimens were stained for pSrc expression (N=10) and stratified into pSrc<sup>low</sup> and pSrc<sup>high</sup> groups for further analysis (scale bar = 50µm) (B). Total pSrc expression between was reported as a percentage area of positive pSrc staining (lower panel). \*p<0.05, \*\*p<0.01.

**A**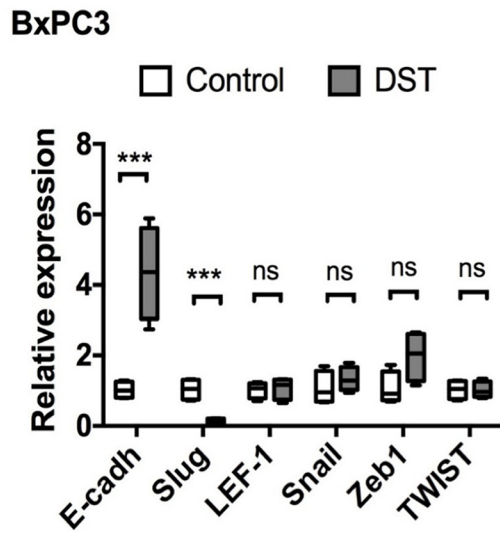**B**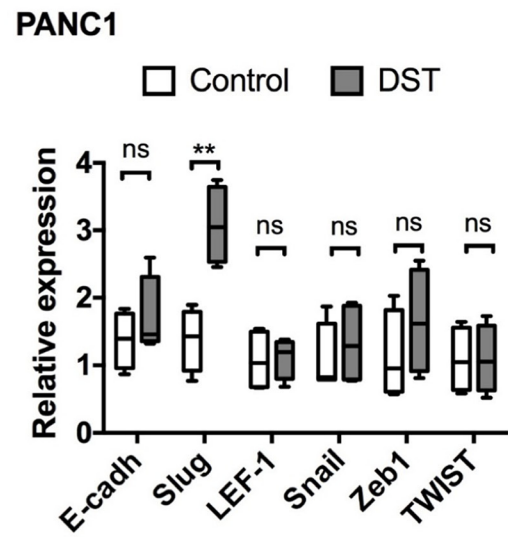**C**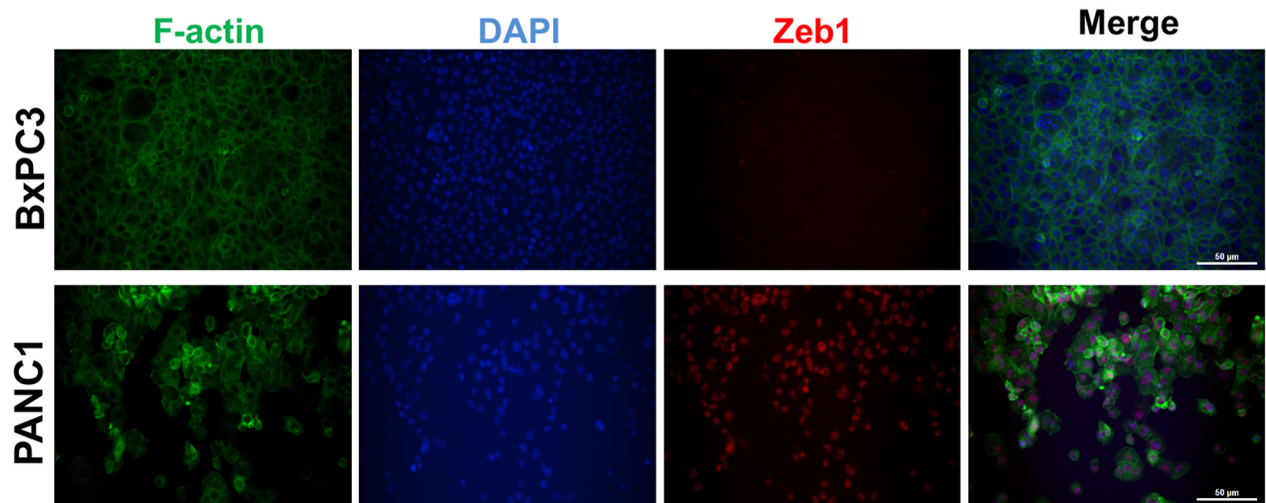

**Supplementary Figure 2:** BxPC3 (A) and PANC1 (B) cells were treated with DMSO or DST (100 nmol/L) for 24 h and transcription levels of E-cadherin, Slug, LEF-1, Snail, Zeb1, and TWIST were measured by qPCR. Levels of Zeb1 (red) were determined in BxPC3 and PANC1 cell lines by immunofluorescence (C). Cells were counterstained with DAPI (blue) and F-actin with Phalloidin (green) (scale bar = 50μm).
